# Supplementary material for: Genetic diversity of the endemic honeybee: Apis mellifera unicolor (Hymenoptera: Apidae) in Madagascar
Source: Springer Nature journal article supplement (doi:10.1007/s13592-015-0362-1), 2015-04-13

**Genetic diversity of the endemic honeybee: *Apis mellifera unicolor* (Hymenoptera: Apidae) in Madagascar**

Henriette Rasolofoarivao<sup>\*+°</sup>, Johanna Clémencet<sup>°</sup>, Maéva Angélique Techer<sup>\*°</sup>, Lala Harivelo Raveloson Ravaomanarivo<sup>+</sup>, Bernard Reynaud<sup>\*</sup>, Hélène Delatte<sup>\*</sup>

\*CIRAD, UMR PVBMT, 97410 Saint-Pierre, La Réunion, France

<sup>+</sup>Département d'Entomologie, Faculté de Sciences, Université d'Antananarivo, B.P. 906, Antananarivo (101), Madagascar

<sup>°</sup>Université de La Réunion, UMR PVBMT, 97715 Saint Denis cedex 9, La Réunion, France

Corresponding author: Hélène Delatte, CIRAD UMR PVBMT, 7, chemin de l'IRAT, 97410 Saint Pierre la Réunion

E-mail: [delatte@cirad.fr](mailto:delatte@cirad.fr)

**Supplementary data (SD Table I).** Sites description. For each of the 76 sampled sites, code (referring to figure 1), name, administrative region of origin and number of sample (i.e colony) successfully amplified for nuclear genetic analysis are given. Asterisks indicate presence for *Varroa destructor* at the collection date.

| Map codes | Sites (S)          | Administrative region (R)    | N  | Map codes | Sites (S)         | Administrative region (R) | N  |
|-----------|--------------------|------------------------------|----|-----------|-------------------|---------------------------|----|
| 1         | Angahimena         | D.I.A.N.A. (R1) <sup>1</sup> | 3  | 39        | Ambohidratrimo A. | Analamanga (R9)           | 9  |
| 2         | Namakia            | D.I.A.N.A. (R1) <sup>1</sup> | 10 | 40        | Ivato             | Analamanga (R9)           | 17 |
| 3         | Antanambao         | D.I.A.N.A. (R1) <sup>1</sup> | 4  | 41        | Ankatso           | Analamanga (R9)           | 2  |
| 4         | Antanambao 1       | D.I.A.N.A. (R1) <sup>1</sup> | 5  | 42        | Andramasina       | Analamanga (R9)           | 10 |
| 5         | Sakaramy           | D.I.A.N.A. (R1) <sup>1</sup> | 4  | 43        | Tonoronala        | Itasy (R10)               | 33 |
| 6         | Antsakoabe         | D.I.A.N.A. (R1) <sup>1</sup> | 3  | 44        | Tsiroanomandidy   | Bongolava (R11)           | 5  |
| 7         | Antsoha A.         | D.I.A.N.A. (R1) <sup>1</sup> | 9  | 45        | Bemasoandro*      | Vakinakaratra (R12)       | 8  |
| 8         | Djamajar           | D.I.A.N.A. (R1) <sup>1</sup> | 6  | 46        | Ankotsaka         | Vakinakaratra (R12)       | 7  |
| 9         | Marompamba A.      | D.I.A.N.A. (R1) <sup>1</sup> | 3  | 47        | Ihazolava         | Vakinakaratra (R12)       | 12 |
| 10        | Mahavelona         | D.I.A.N.A. (R1) <sup>1</sup> | 6  | 48        | Anativato 1       | Vakinakaratra (R12)       | 7  |
| 11        | Analamandrorofo    | S.A.V.A. (R2) <sup>2</sup>   | 16 | 49        | Anativato 2       | Vakinakaratra (R12)       | 11 |
| 12        | Analapenja         | S.A.V.A. (R2) <sup>2</sup>   | 4  | 50        | Mahazina          | Vakinakaratra (R12)       | 10 |
| 13        | Analapenja         | S.A.V.A. (R2) <sup>2</sup>   | 11 | 51        | Antsirabe         | Vakinakaratra (R12)       | 4  |
| 14        | Andranomatsioka    | S.A.V.A. (R2) <sup>2</sup>   | 3  | 52        | Soanirina         | Amoron'i M. (R13)         | 11 |
| 15        | Antohomarina       | S.A.V.A. (R2) <sup>2</sup>   | 22 | 53        | Ambositra         | Amoron'i M. (R13)         | 10 |
| 16        | Antohomarina       | S.A.V.A. (R2) <sup>2</sup>   | 5  | 54        | Tsararano A.      | Amoron'i M. (R13)         | 43 |
| 17        | Sarahandrano       | S.A.V.A. (R2) <sup>2</sup>   | 5  | 55        | Vohimasina        | Amoron'i M. (R13)         | 22 |
| 18        | Belle Rose         | S.A.V.A. (R2) <sup>2</sup>   | 9  | 56        | Morondava         | Menabe (R14)              | 4  |
| 19        | Beromba            | Sofia (R3)                   | 2  | 57        | Mahabobe          | Menabe (R14)              | 1  |
| 20        | Tsararano M.1      | Boeny (R4)                   | 10 | 58        | Tsimahavaobe      | Menabe (R14)              | 6  |
| 21        | Tsararano M.2      | Boeny (R4)                   | 15 | 59        | Tsimahavaokely    | Menabe (R14)              | 2  |
| 22        | Tsaramandroso      | Boeny (R4)                   | 10 | 60        | Analahiva         | Menabe (R14)              | 3  |
| 23        | Andranofasika      | Boeny (R4)                   | 5  | 61        | Ankilozato        | Menabe (R14)              | 1  |
| 24        | Rantolava          | Analanjirofo (R5)            | 3  | 62        | Manitsara         | Menabe (R14)              | 6  |
| 25        | Mahambo            | Analanjirofo (R5)            | 2  | 63        | Androvabe         | Menabe (R14)              | 11 |
| 26        | Fenerive 1         | Analanjirofo (R5)            | 1  | 64        | Androvabe PM      | Menabe (R14)              | 7  |
| 27        | Fenerive 2         | Analanjirofo (R5)            | 1  | 65        | Manakara          | Vato V. (R15)             | 5  |
| 28        | Ambodihazomamy     | Antsinanana (R6)             | 3  | 66        | Toliary           | Atsimo A. (R16)           | 30 |
| 29        | Anivorano B.       | Antsinanana (R7)             | 1  | 67        | Bezaha            | Atsimo A. (R16)           | 23 |
| 30        | Sahavazo M.        | Alaotra M. (R8)              | 1  | 68        | Mahatalaky        | Anosy (R17)               | 17 |
| 31        | Masakalina         | Analamanga (R9)              | 8  | 69        | Mahatalaky        | Anosy (R17)               | 8  |
| 32        | Ambohitrolomahitsy | Analamanga (R9)              | 7  | 70        | Ifarantsy         | Anosy (R17)               | 10 |
| 33        | Amby               | Analamanga (R9)              | 8  | 71        | Ifarantsy 1       | Anosy (R17)               | 16 |
| 34        | Ambotseheny        | Analamanga (R9)              | 19 | 72        | Ampasy N.         | Anosy (R17)               | 10 |
| 35        | Betoho             | Analamanga (R9)              | 16 | 73        | Ampasy N.1        | Anosy (R17)               | 6  |
| 36        | Anjepy             | Analamanga (R9)              | 12 | 74        | Soanierana        | Anosy (R17)               | 21 |
| 37        | Maharidaza         | Analamanga (R9)              | 10 | 75        | Ankaramena        | Anosy (R17)               | 13 |
| 38        | Mandraka           | Analamanga (R9)              | 12 | 76        | Ambovombe         | Androy (R18)              | 15 |

<sup>1</sup>D.I.A.N.A.: Diego, Ambilobe, Nosybe, Ambanja <sup>2</sup>S.A.V.A.: Sambava, Antalaha, Vohemar, Andapa.

**Supplementary data (SD Table II).** Genetic diversity indices per geographical regions investigated in Madagascar.

| <b>Geographical region</b> | <b>H<sub>O</sub></b> | <b>H<sub>S</sub></b> | <b>F<sub>IS</sub></b> | <b>F<sub>ST</sub></b> |
|----------------------------|----------------------|----------------------|-----------------------|-----------------------|
| North-East                 | 0.365                | 0.403                | 0.094                 | 0.019                 |
| North-West                 | 0.371                | 0.432                | 0.140                 | 0.013                 |
| Hauts- Plateaux (central)  | 0.374                | 0.410                | 0.087                 | 0.058                 |
| Hauts- Plateaux (South)    | 0.374                | 0.398                | 0.061                 | 0.003                 |
| West South                 | 0.368                | 0.410                | 0.101                 | 0.025                 |
| South                      | 0.383                | 0.415                | 0.076                 | 0.006                 |

1 **Supplementary data (SD Table III).** Pairwise  $F_{ST}$  estimates values between pairs of 32 sites (Weir and Cockerham (1984)). Significant  $P$ -value (5%) are in  
 2 bold and highlighted in grey.

|      | North       | North-East  |             |             |             | North-West  |             |             | High-Plateau |             |             |             |             |             |             |             |             |             | High-Plateau - South |             |             |             |             | West        | South-West  |       |       | South |             |       |      |  |  |  |  |
|------|-------------|-------------|-------------|-------------|-------------|-------------|-------------|-------------|--------------|-------------|-------------|-------------|-------------|-------------|-------------|-------------|-------------|-------------|----------------------|-------------|-------------|-------------|-------------|-------------|-------------|-------|-------|-------|-------------|-------|------|--|--|--|--|
| site | 2           | 11          | 13          | 15          | 20          | 21          | 22          | 34          | 35           | 36          | 37          | 38          | 40          | 42          | 43          | 47          | 49          | 50          | 52                   | 53          | 54          | 55          | 63          | 66          | 67          | 68    | 70    | 71    | 72          | 74    | 75   |  |  |  |  |
| 11   | 0.02        |             |             |             |             |             |             |             |              |             |             |             |             |             |             |             |             |             |                      |             |             |             |             |             |             |       |       |       |             |       |      |  |  |  |  |
| 13   | 0.03        | 0.03        |             |             |             |             |             |             |              |             |             |             |             |             |             |             |             |             |                      |             |             |             |             |             |             |       |       |       |             |       |      |  |  |  |  |
| 15   | 0.01        | 0.01        | 0.01        |             |             |             |             |             |              |             |             |             |             |             |             |             |             |             |                      |             |             |             |             |             |             |       |       |       |             |       |      |  |  |  |  |
| 20   | <b>0.05</b> | <b>0.03</b> | <b>0.07</b> | <b>0.03</b> |             |             |             |             |              |             |             |             |             |             |             |             |             |             |                      |             |             |             |             |             |             |       |       |       |             |       |      |  |  |  |  |
| 21   | <b>0.03</b> | 0.02        | <b>0.05</b> | <b>0.05</b> | <b>0.03</b> |             |             |             |              |             |             |             |             |             |             |             |             |             |                      |             |             |             |             |             |             |       |       |       |             |       |      |  |  |  |  |
| 22   | <b>0.04</b> | 0.02        | <b>0.05</b> | 0.03        | -0.02       | 0.01        |             |             |              |             |             |             |             |             |             |             |             |             |                      |             |             |             |             |             |             |       |       |       |             |       |      |  |  |  |  |
| 34   | <b>0.04</b> | 0.01        | <b>0.02</b> | <b>0.02</b> | 0.02        | <b>0.05</b> | 0.01        |             |              |             |             |             |             |             |             |             |             |             |                      |             |             |             |             |             |             |       |       |       |             |       |      |  |  |  |  |
| 35   | <b>0.03</b> | 0.02        | <b>0.06</b> | <b>0.03</b> | 0.02        | <b>0.07</b> | 0.02        | <b>0.02</b> |              |             |             |             |             |             |             |             |             |             |                      |             |             |             |             |             |             |       |       |       |             |       |      |  |  |  |  |
| 36   | <b>0.04</b> | 0.01        | <b>0.06</b> | <b>0.04</b> | <b>0.05</b> | <b>0.06</b> | <b>0.06</b> | <b>0.03</b> | <b>0.04</b>  |             |             |             |             |             |             |             |             |             |                      |             |             |             |             |             |             |       |       |       |             |       |      |  |  |  |  |
| 37   | <b>0.04</b> | <b>0.05</b> | <b>0.08</b> | <b>0.05</b> | 0.03        | <b>0.08</b> | 0.03        | 0.02        | -0.02        | <b>0.05</b> |             |             |             |             |             |             |             |             |                      |             |             |             |             |             |             |       |       |       |             |       |      |  |  |  |  |
| 38   | <b>0.04</b> | 0.01        | <b>0.03</b> | 0.02        | <b>0.05</b> | 0.02        | 0.03        | 0.00        | <b>0.04</b>  | 0.01        | <b>0.05</b> |             |             |             |             |             |             |             |                      |             |             |             |             |             |             |       |       |       |             |       |      |  |  |  |  |
| 40   | <b>0.10</b> | <b>0.08</b> | <b>0.12</b> | <b>0.11</b> | <b>0.11</b> | <b>0.12</b> | <b>0.07</b> | <b>0.08</b> | <b>0.07</b>  | <b>0.08</b> | <b>0.06</b> | <b>0.11</b> |             |             |             |             |             |             |                      |             |             |             |             |             |             |       |       |       |             |       |      |  |  |  |  |
| 42   | 0.02        | 0.00        | <b>0.04</b> | 0.01        | 0.01        | 0.01        | 0.00        | -0.01       | 0.02         | 0.00        | 0.01        | -0.02       | <b>0.08</b> |             |             |             |             |             |                      |             |             |             |             |             |             |       |       |       |             |       |      |  |  |  |  |
| 43   | <b>0.06</b> | <b>0.02</b> | <b>0.05</b> | <b>0.03</b> | <b>0.05</b> | <b>0.05</b> | <b>0.05</b> | <b>0.04</b> | <b>0.04</b>  | <b>0.06</b> | <b>0.06</b> | <b>0.03</b> | <b>0.13</b> | <b>0.04</b> |             |             |             |             |                      |             |             |             |             |             |             |       |       |       |             |       |      |  |  |  |  |
| 47   | <b>0.03</b> | 0.02        | 0.04        | <b>0.02</b> | <b>0.05</b> | <b>0.04</b> | <b>0.05</b> | 0.03        | <b>0.06</b>  | <b>0.03</b> | <b>0.08</b> | 0.02        | <b>0.12</b> | 0.01        | <b>0.04</b> |             |             |             |                      |             |             |             |             |             |             |       |       |       |             |       |      |  |  |  |  |
| 49   | <b>0.04</b> | 0.02        | <b>0.06</b> | 0.01        | <b>0.07</b> | <b>0.03</b> | <b>0.04</b> | <b>0.05</b> | <b>0.07</b>  | <b>0.05</b> | <b>0.10</b> | <b>0.03</b> | <b>0.10</b> | 0.02        | <b>0.05</b> | 0.01        |             |             |                      |             |             |             |             |             |             |       |       |       |             |       |      |  |  |  |  |
| 50   | <b>0.07</b> | <b>0.04</b> | <b>0.09</b> | <b>0.08</b> | <b>0.07</b> | <b>0.06</b> | <b>0.09</b> | <b>0.07</b> | <b>0.08</b>  | <b>0.07</b> | <b>0.11</b> | <b>0.05</b> | <b>0.17</b> | <b>0.07</b> | <b>0.07</b> | <b>0.08</b> | <b>0.12</b> |             |                      |             |             |             |             |             |             |       |       |       |             |       |      |  |  |  |  |
| 52   | <b>0.10</b> | <b>0.05</b> | <b>0.12</b> | <b>0.13</b> | <b>0.11</b> | <b>0.13</b> | <b>0.09</b> | <b>0.05</b> | <b>0.08</b>  | <b>0.07</b> | <b>0.07</b> | <b>0.08</b> | <b>0.07</b> | <b>0.03</b> | <b>0.12</b> | <b>0.13</b> | <b>0.13</b> | <b>0.16</b> |                      |             |             |             |             |             |             |       |       |       |             |       |      |  |  |  |  |
| 53   | 0.00        | 0.00        | 0.01        | 0.00        | 0.00        | 0.03        | -0.01       | -0.02       | 0.00         | 0.02        | 0.00        | 0.03        | <b>0.08</b> | -0.02       | <b>0.04</b> | 0.04        | <b>0.05</b> | <b>0.07</b> | <b>0.04</b>          |             |             |             |             |             |             |       |       |       |             |       |      |  |  |  |  |
| 54   | <b>0.11</b> | <b>0.05</b> | <b>0.07</b> | <b>0.09</b> | <b>0.08</b> | <b>0.12</b> | <b>0.08</b> | <b>0.03</b> | <b>0.07</b>  | <b>0.08</b> | <b>0.06</b> | <b>0.07</b> | <b>0.11</b> | <b>0.03</b> | <b>0.10</b> | <b>0.13</b> | <b>0.14</b> | <b>0.14</b> | 0.01                 | <b>0.01</b> |             |             |             |             |             |       |       |       |             |       |      |  |  |  |  |
| 55   | <b>0.09</b> | <b>0.04</b> | <b>0.08</b> | <b>0.08</b> | <b>0.06</b> | <b>0.11</b> | <b>0.06</b> | <b>0.02</b> | <b>0.04</b>  | <b>0.07</b> | <b>0.04</b> | <b>0.07</b> | <b>0.08</b> | <b>0.02</b> | <b>0.09</b> | <b>0.11</b> | <b>0.12</b> | <b>0.13</b> | 0.00                 | 0.00        | -0.01       |             |             |             |             |       |       |       |             |       |      |  |  |  |  |
| 63   | <b>0.12</b> | <b>0.08</b> | <b>0.14</b> | <b>0.13</b> | <b>0.11</b> | <b>0.12</b> | <b>0.09</b> | <b>0.08</b> | <b>0.13</b>  | <b>0.10</b> | <b>0.10</b> | <b>0.10</b> | <b>0.12</b> | <b>0.05</b> | <b>0.16</b> | <b>0.15</b> | <b>0.15</b> | <b>0.17</b> | 0.02                 | <b>0.06</b> | <b>0.07</b> | <b>0.06</b> |             |             |             |       |       |       |             |       |      |  |  |  |  |
| 66   | 0.02        | 0.01        | 0.03        | <b>0.03</b> | <b>0.03</b> | <b>0.02</b> | 0.02        | <b>0.02</b> | <b>0.04</b>  | <b>0.03</b> | <b>0.06</b> | 0.01        | <b>0.13</b> | 0.02        | <b>0.03</b> | <b>0.05</b> | <b>0.05</b> | <b>0.03</b> | <b>0.13</b>          | 0.01        | <b>0.09</b> | <b>0.09</b> | <b>0.15</b> |             |             |       |       |       |             |       |      |  |  |  |  |
| 67   | <b>0.04</b> | <b>0.02</b> | <b>0.05</b> | <b>0.04</b> | 0.01        | <b>0.05</b> | <b>0.03</b> | <b>0.01</b> | <b>0.03</b>  | <b>0.03</b> | <b>0.04</b> | <b>0.03</b> | <b>0.11</b> | 0.00        | <b>0.06</b> | <b>0.05</b> | <b>0.07</b> | <b>0.07</b> | <b>0.08</b>          | 0.00        | <b>0.05</b> | <b>0.05</b> | <b>0.10</b> | <b>0.02</b> |             |       |       |       |             |       |      |  |  |  |  |
| 68   | 0.02        | 0.00        | 0.01        | <b>0.02</b> | 0.02        | 0.01        | 0.01        | 0.00        | <b>0.03</b>  | 0.02        | <b>0.04</b> | 0.00        | <b>0.09</b> | -0.01       | <b>0.04</b> | 0.02        | <b>0.04</b> | <b>0.04</b> | <b>0.05</b>          | -0.01       | <b>0.05</b> | <b>0.04</b> | <b>0.07</b> | 0.01        | 0.01        |       |       |       |             |       |      |  |  |  |  |
| 70   | <b>0.03</b> | 0.02        | 0.03        | 0.01        | 0.02        | <b>0.04</b> | 0.01        | 0.01        | 0.01         | <b>0.04</b> | <b>0.04</b> | <b>0.03</b> | <b>0.11</b> | 0.00        | <b>0.04</b> | <b>0.04</b> | <b>0.07</b> | <b>0.09</b> | <b>0.10</b>          | -0.02       | <b>0.08</b> | <b>0.05</b> | <b>0.11</b> | 0.02        | <b>0.04</b> | 0.00  |       |       |             |       |      |  |  |  |  |
| 71   | 0.01        | 0.00        | 0.02        | 0.01        | 0.02        | 0.02        | <b>0.02</b> | 0.01        | <b>0.03</b>  | 0.01        | <b>0.05</b> | 0.02        | <b>0.10</b> | 0.00        | <b>0.05</b> | <b>0.02</b> | <b>0.03</b> | <b>0.05</b> | <b>0.10</b>          | -0.02       | <b>0.08</b> | <b>0.07</b> | <b>0.13</b> | 0.01        | 0.01        | 0.00  | 0.01  |       |             |       |      |  |  |  |  |
| 72   | <b>0.04</b> | 0.01        | 0.02        | 0.02        | <b>0.04</b> | <b>0.05</b> | 0.03        | -0.01       | 0.03         | 0.01        | 0.04        | 0.01        | <b>0.08</b> | -0.02       | <b>0.06</b> | <b>0.05</b> | <b>0.07</b> | <b>0.10</b> | <b>0.04</b>          | -0.02       | <b>0.02</b> | 0.02        | <b>0.05</b> | <b>0.03</b> | <b>0.03</b> | -0.01 | -0.02 | 0.02  |             |       |      |  |  |  |  |
| 74   | <b>0.03</b> | 0.01        | 0.01        | <b>0.02</b> | <b>0.03</b> | <b>0.02</b> | <b>0.03</b> | <b>0.02</b> | <b>0.04</b>  | <b>0.03</b> | <b>0.07</b> | 0.01        | <b>0.12</b> | 0.00        | <b>0.03</b> | <b>0.03</b> | <b>0.05</b> | <b>0.05</b> | <b>0.11</b>          | 0.01        | <b>0.08</b> | <b>0.08</b> | <b>0.14</b> | 0.01        | <b>0.03</b> | 0.00  | 0.01  | 0.00  | 0.01        |       |      |  |  |  |  |
| 75   | <b>0.03</b> | 0.01        | 0.03        | <b>0.02</b> | 0.01        | <b>0.03</b> | 0.03        | 0.02        | 0.02         | <b>0.03</b> | <b>0.04</b> | 0.01        | <b>0.12</b> | 0.00        | <b>0.02</b> | <b>0.04</b> | <b>0.08</b> | 0.03        | <b>0.08</b>          | 0.01        | <b>0.06</b> | <b>0.05</b> | <b>0.12</b> | 0.01        | <b>0.02</b> | 0.00  | 0.01  | 0.01  | 0.03        | -0.01 |      |  |  |  |  |
| 76   | <b>0.03</b> | 0.01        | 0.02        | <b>0.02</b> | 0.03        | -0.01       | 0.01        | <b>0.02</b> | <b>0.03</b>  | <b>0.04</b> | <b>0.05</b> | 0.01        | <b>0.11</b> | 0.01        | <b>0.02</b> | 0.01        | <b>0.03</b> | <b>0.06</b> | <b>0.12</b>          | 0.03        | <b>0.11</b> | <b>0.09</b> | <b>0.12</b> | 0.02        | <b>0.04</b> | 0.00  | 0.02  | 0.01  | <b>0.03</b> | 0.01  | 0.01 |  |  |  |  |

**Supplementary data (SD Table IV).** Hierarchical analysis of molecular variance (AMOVA) determining the proportion of genetic variation partitioned among the 6 geographical regions containing at least two sites with more than 10 individuals, among sites within regions and within regions.

| <b>Source of variation</b>   | <b>Degrees of freedom</b> | <b>Sum of square</b> | <b>Variance component</b> | <b>Percentage of variation</b> | <b>Fixation indices</b> |
|------------------------------|---------------------------|----------------------|---------------------------|--------------------------------|-------------------------|
| Between geographical regions | 5                         | 86.575               | 0.081                     | 2.33                           | $F_{CT}$ 0.023***       |
| Among sites within regions   | 24                        | 151.004              | 0.116                     | 3.34                           | $F_{SC}$ 0.034***       |
| Within sites                 | 944                       | 2776.455             | 3.261                     | 94.33                          | $F_{ST}$ 0.057***       |
|                              | 973                       | 3014.033             | 3.457                     | 100                            |                         |

**Supplementary data (SD Table V).** Description of the 18 mitochondrial haplotypes obtained through sequencing of the COI-COII region from *A. m. unicolor* from Madagascar. For each haplotype are indicated: code, accession number, number of samples per haplotype and distribution among geographical region S(), n= number of samples per haplotype.

| Names    | Accession number | N   | North S1-10                                                                   | North-East S11-18             | North West S19-23                           | East S24-29; S65                                    | Hauts Plateaux S30-55                                                                                                                                                                                         | South-west S66-67  | South S68-76                             |
|----------|------------------|-----|-------------------------------------------------------------------------------|-------------------------------|---------------------------------------------|-----------------------------------------------------|---------------------------------------------------------------------------------------------------------------------------------------------------------------------------------------------------------------|--------------------|------------------------------------------|
| A1_Mad1  | KF976992         | 14  |                                                                               |                               |                                             | S65 (2)                                             | S31 (5)<br>S32 (3)<br>S35 (1)<br>S33 (2)                                                                                                                                                                      |                    |                                          |
| A1_Mad2  | KF976993         | 17  |                                                                               |                               |                                             |                                                     | S41 (1)<br>S32 (2)<br>S35 (4)<br>S65 (5)<br>S39 (3)<br>S41 (3)                                                                                                                                                |                    |                                          |
| A1_Mad3  | KF976994         | 121 | S2 (1)<br>S3 (3)<br>S4 (3)<br>S5 (1)<br>S7 (1)<br>S8 (3)<br>S9 (2)<br>S10 (1) | S14 (2)<br>S15 (5)<br>S16 (2) | S19 (3)<br>S20/21(10)<br>S22 (4)<br>S23 (2) | S24 (6)<br>S25 (3)<br>S28 (4)<br>S29 (1)<br>S65 (3) | S30 (1)<br>S31 (3)<br>S32 (1)<br>S33 (1)<br>S34 (1)<br>S35 (1)<br>S36 (1)<br>S37 (3)<br>S38 (1)<br>S40 (8)<br>S41 (2)<br>S42 (3)<br>S43 (4)<br>S44 (2)<br>S45 (3)<br>S48 (4)<br>S49 (3)<br>S50 (2)<br>S53 (1) | S66 (3)<br>S67 (4) | S68 (3)<br>S73 (2)<br>S74 (2)<br>S75 (2) |
| A1_Mad4  | KF976995         | 1   |                                                                               |                               | S19 (1)                                     |                                                     |                                                                                                                                                                                                               |                    |                                          |
| A1_Mad5  | KF976996         | 2   |                                                                               | S18 (1)<br>S14 (1)            |                                             |                                                     |                                                                                                                                                                                                               |                    |                                          |
| A1_Mad6  | KF976997         | 1   | S9 (1)                                                                        |                               |                                             |                                                     |                                                                                                                                                                                                               |                    |                                          |
| A1_Mad7  | KF976998         | 1   |                                                                               | S18 (1)                       |                                             |                                                     |                                                                                                                                                                                                               |                    |                                          |
| A1_Mad8  | KF976999         | 1   |                                                                               | S11 (1)                       |                                             |                                                     |                                                                                                                                                                                                               |                    |                                          |
| A1_Mad9  | KF977000         | 2   |                                                                               | S11 (1)                       |                                             |                                                     |                                                                                                                                                                                                               |                    | S74 (1)                                  |
| A1_Mad10 | KF977001         | 3   | S7 (2)                                                                        |                               | S22 (1)                                     |                                                     |                                                                                                                                                                                                               |                    |                                          |
| A1_Mad11 | KF977002         | 1   |                                                                               |                               |                                             |                                                     | S41 (1)                                                                                                                                                                                                       |                    |                                          |
| A1_Mad12 | KF977003         | 1   |                                                                               |                               |                                             |                                                     |                                                                                                                                                                                                               | S66 (1)            |                                          |
| A1_Mad13 | KF977004         | 2   |                                                                               |                               | S22 (1)                                     | S29 (1)                                             |                                                                                                                                                                                                               |                    |                                          |
| A1_Mad14 | KF977005         | 1   |                                                                               |                               |                                             |                                                     | S44 (1)                                                                                                                                                                                                       |                    |                                          |
| A1_Mad15 | KF977006         | 2   | S4 (1)                                                                        | S11 (1)                       |                                             |                                                     |                                                                                                                                                                                                               |                    |                                          |
| A1_Mad16 | KF977007         | 1   |                                                                               |                               |                                             |                                                     |                                                                                                                                                                                                               |                    | S73 (1)                                  |
| A4_Mad1  | KF977008         | 1   |                                                                               |                               |                                             |                                                     |                                                                                                                                                                                                               | S66 (1)            |                                          |
| A4_Mad2  | KF977009         | 1   |                                                                               |                               | S23 (1)                                     |                                                     |                                                                                                                                                                                                               |                    |                                          |
|          | <b>Total</b>     | 173 |                                                                               |                               |                                             |                                                     |                                                                                                                                                                                                               |                    |                                          |

**Figure supplementary data (SD Fig. 1): A & A'.** absolute values of the likelihood distribution (mean±SD) calculated according to the formula:  $|L''(K)|=|L'(K+1)-L'(K)|$  (Evanno et al. 2005), implemented in Structure Harvester on the web, for the Malagasy dataset (A) and full dataset including Madagascar and South African individuals (A') **B.** delta K calculated as  $(\Delta k) = m|L''(K)|/s[L(K)]$  according to Evanno et al. (2005), for the Malagasy dataset (B) and the Malagasy and full dataset including Madagascar and South African individuals (B') The modal value of this distribution is the K=2 in both cases.

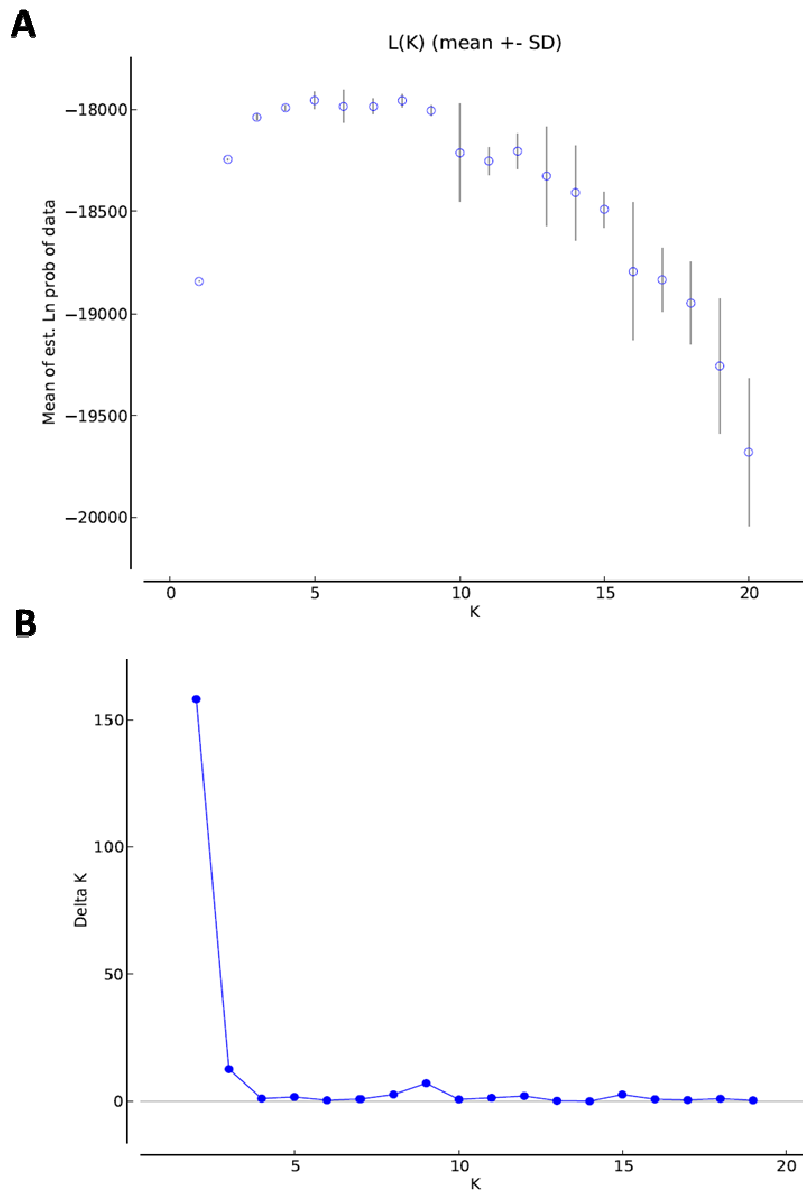

**A'**

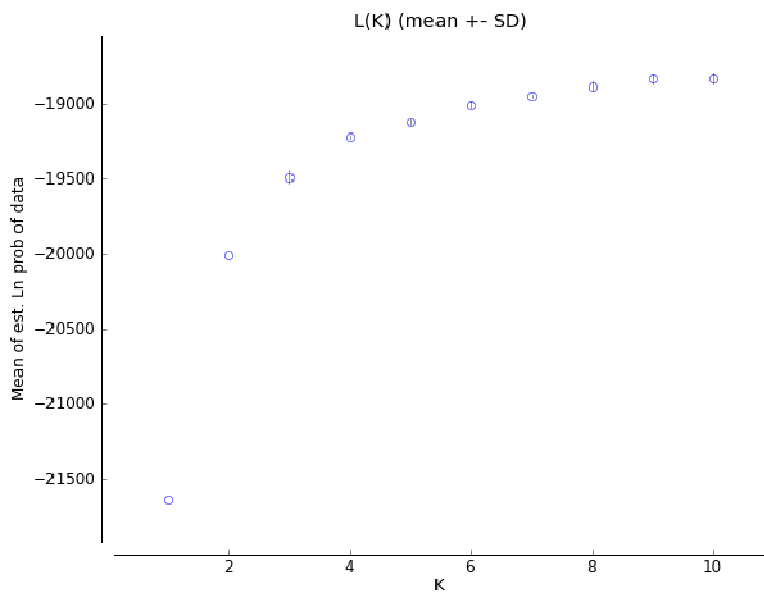

**B'**

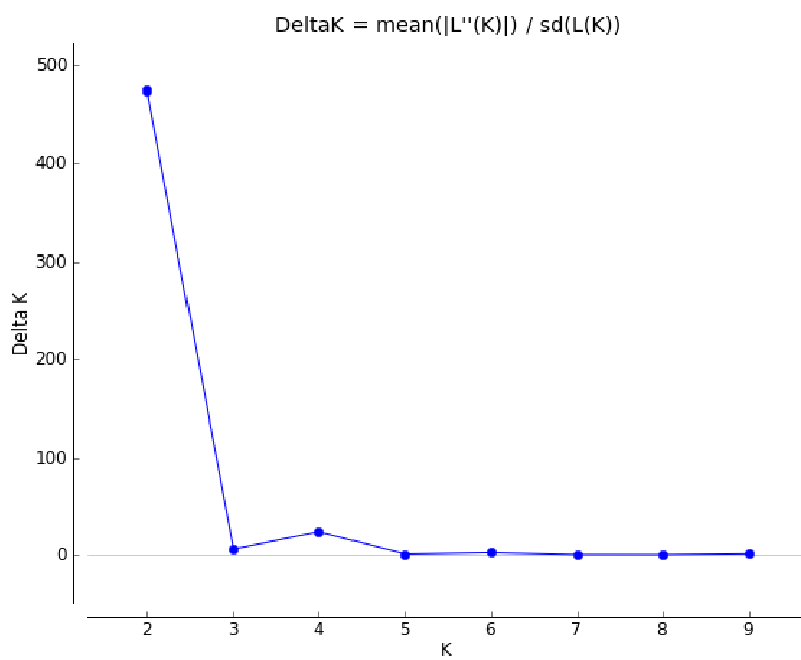



**Figure Supplementary data (SD Fig. 2).** Intra-Madagascar population structure and Euclidean distances among genetic clusters based on 17 microsatellites *loci*. Top: STRUCTURE barplots (K = 2, 3, 4 and 5) of the 710 individuals order by sampling sites (S1-76). Bottom: PCAs of Euclidean distances among individual genotypes assigned to the different clusters (K = 2, 3, 4 and 5). Inertia percentage of each axis is indicated (using 131 variables).

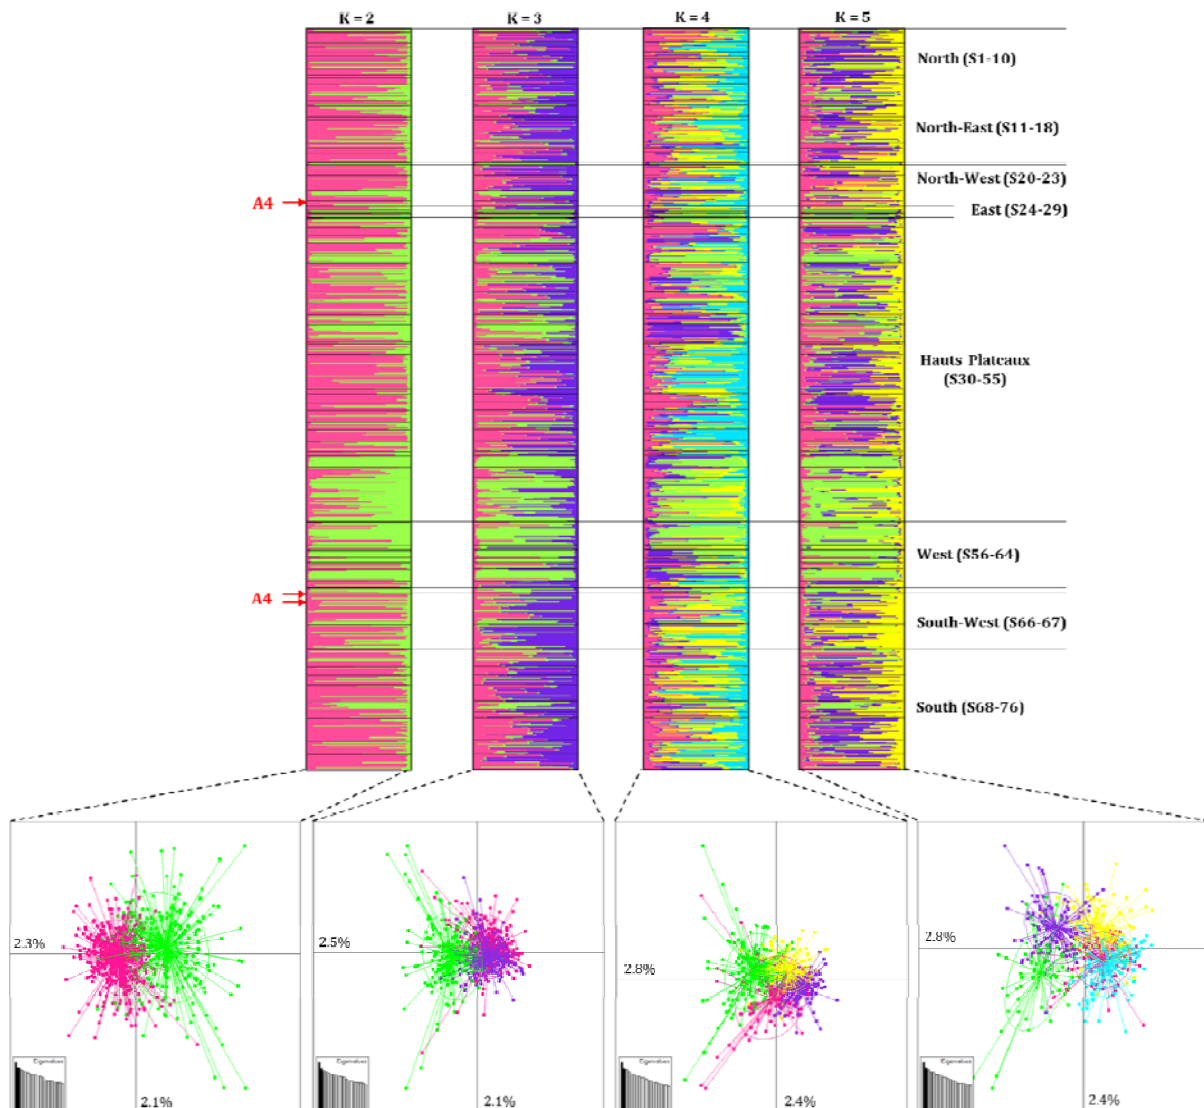

**Figure Supplementary data (SD Fig. 3).** Minimum-spanning network depicting relationships between the mtDNA A1 haplotypes (519 bp) detected in Madagascar. Plain lines represent one substitution/deletion event. Dashed lines represent the deletion of 4 adjacent bases, that could result in one mutational event.

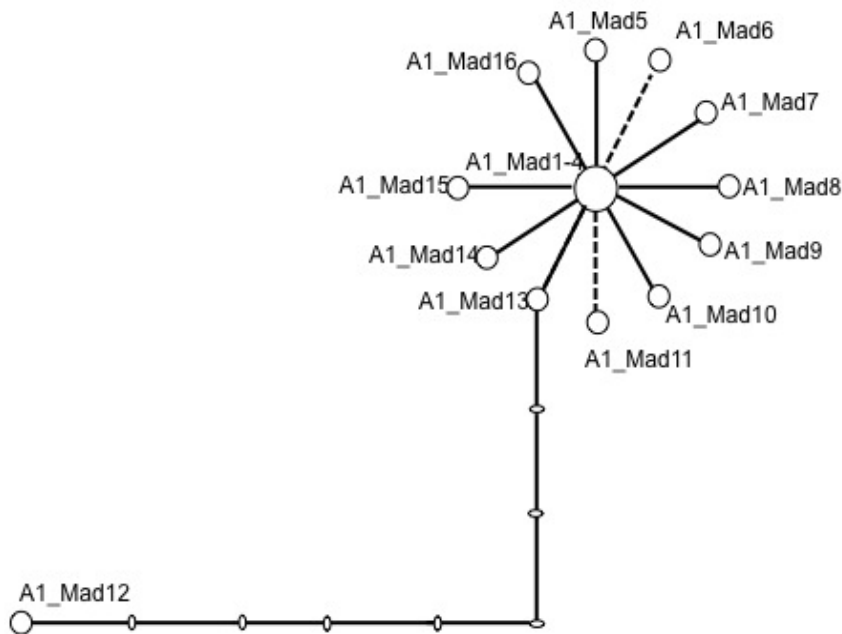

Supplement: MOESM1 [file 13592_2015_362_MOESM1_ESM.pdf]
